# Supplementary material for: Optimizing Deficit Irrigation Management to Improve Water Productivity of Greenhouse Tomato under Plastic Film Mulching Using the RZ-SHAW Model
Source: MDPI journal article supplement (doi:10.3390/agriculture12081253), 2022-08-18
Supplement: s1 [file s1]

Archive with 1 entries (1 files):
- agriculture-1848842-supplementary.pdf
