# Supplementary material for: Optimizing Deficit Irrigation Management to Improve Water Productivity of Greenhouse Tomato under Plastic Film Mulching Using the RZ-SHAW Model
Source: MDPI journal article supplement (doi:10.3390/agriculture12081253), 2022-08-18
Supplement: s1 [file s1 › agriculture-1848842-supplementary.pdf]

**Supplementary Materials of**  
**Optimizing Deficit Irrigation Management to Improve Water**  
**Productivity of Greenhouse Tomato under Plastic Film Mulching**  
**Using the RZ-SHAW Model**

**This file includes:**

- 1. Table S1**
- 2. Figure S1**
- 3. Table S2**

**Table S1.** The soil physicochemical properties at the field experiment site.

| Soil type | pH  | OM (%) | EC (dS m <sup>-1</sup> ) | Nutrients                |                          |                          | FC (%) | PWP (%) |
|-----------|-----|--------|--------------------------|--------------------------|--------------------------|--------------------------|--------|---------|
|           |     |        |                          | N (mg kg <sup>-1</sup> ) | P (mg kg <sup>-1</sup> ) | K (mg kg <sup>-1</sup> ) |        |         |
| Sand loam | 7.1 | 1.9    | 0.26                     | 108.0                    | 40.5                     | 82.0                     | 18.0   | 8.0     |

Note: OM, organic matter; EC, electrical conductivity; N, nitrogen; P, phosphorus; K, potassium; FC, field capacity; PWP, permanent wilting point.

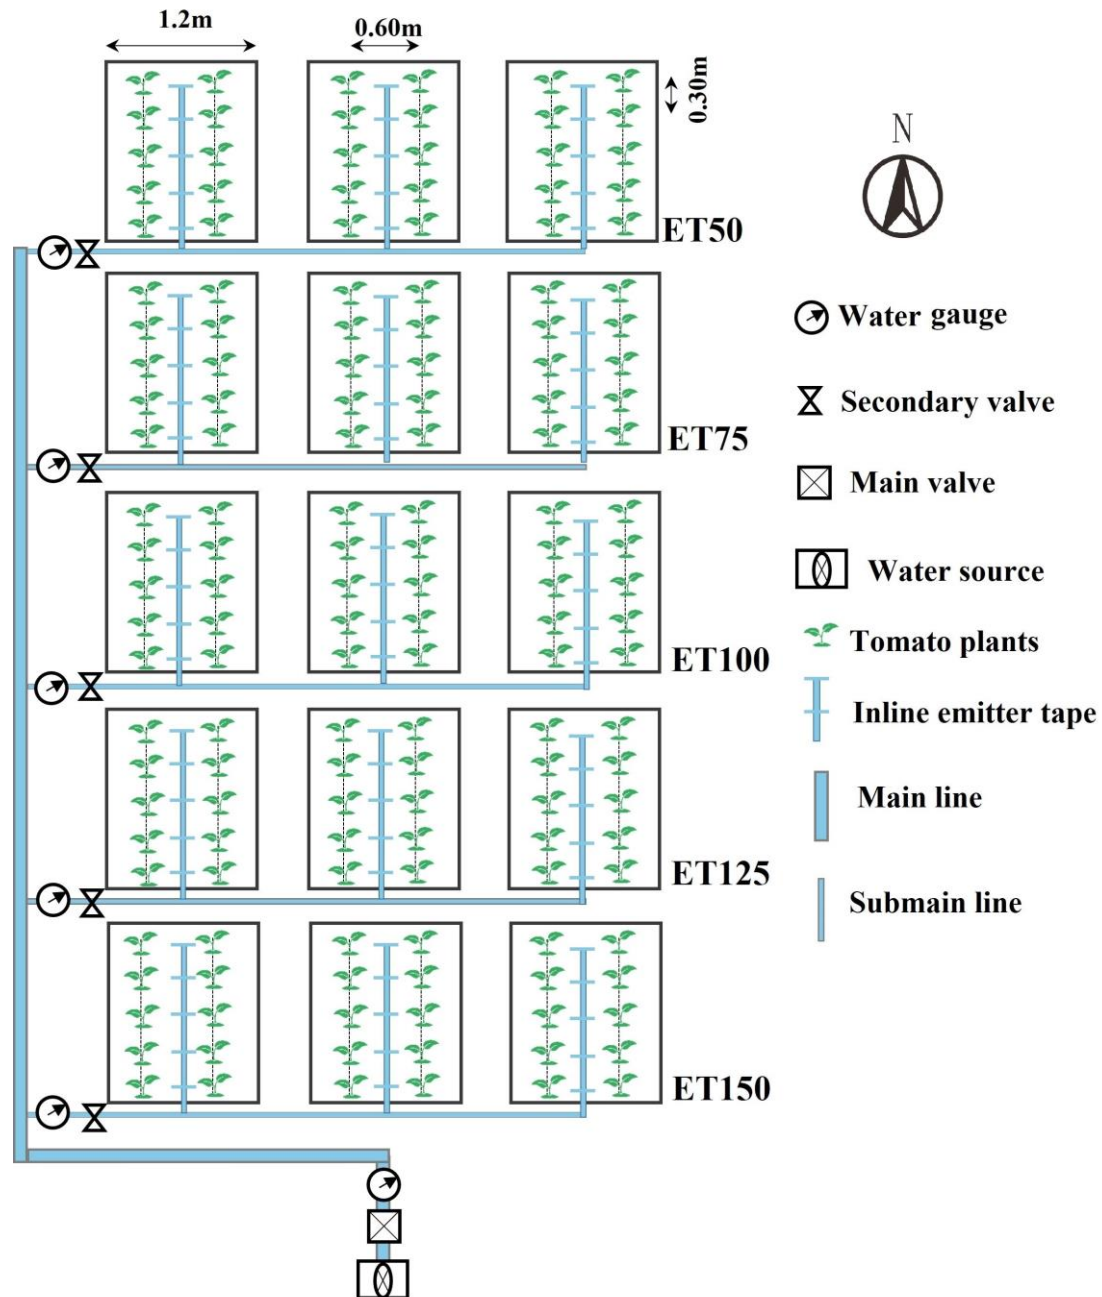

**Figure S1** Layout of installed drip system and experimental design in tomato greenhouse.

**Table S2** Deficit irrigation (DI) rates and scheduling in each scenario

| Irrigation Events        | Irrigation Date | Irrigation rates (cm) |       |       |       |       |       |       |
|--------------------------|-----------------|-----------------------|-------|-------|-------|-------|-------|-------|
|                          |                 | ET50                  | ET75  | ET100 | ET125 | ET150 | ET95  | ET200 |
| 1                        | 01 April        | 0.28                  | 0.40  | 0.52  | 0.68  | 0.77  | 0.50  | 0.95  |
| 2                        | 11 April        | 0.33                  | 0.50  | 0.67  | 0.83  | 1.00  | 0.64  | 1.34  |
| 3                        | 21 April        | 0.33                  | 0.50  | 0.67  | 0.83  | 1.00  | 0.64  | 1.34  |
| 4                        | 28 April        | 1.00                  | 1.50  | 2.00  | 2.50  | 3.00  | 1.90  | 4.00  |
| 5                        | 05 May          | 1.00                  | 1.50  | 0.56  | 2.50  | 3.00  | 0.75  | 4.00  |
| 6                        | 12 May          | 1.00                  | 1.50  | 2.00  | 2.50  | 3.00  | 1.90  | 4.00  |
| 7                        | 19 May          | 1.00                  | 1.50  | 2.00  | 2.50  | 3.00  | 1.90  | 4.00  |
| 8                        | 26 May          | 1.00                  | 1.50  | 2.00  | 2.50  | 3.00  | 1.90  | 4.00  |
| 9                        | 02 June         | 0.50                  | 0.75  | 1.00  | 1.25  | 1.50  | 0.95  | 2.00  |
| 10                       | 09 June         | 0.50                  | 0.75  | 1.00  | 1.25  | 1.50  | 0.95  | 2.00  |
| 11                       | 16 June         | 0.50                  | 0.75  | 1.00  | 1.25  | 1.50  | 0.95  | 2.00  |
| 12                       | 23 June         | 0.50                  | 0.75  | 1.00  | 1.25  | 1.50  | 0.95  | 2.00  |
| 13                       | 03 July         | 0.50                  | 0.75  | 1.00  | 1.25  | 1.50  | 0.95  | 2.00  |
| 14                       | 13 July         | 0.71                  | 0.04  | 1.00  | 0.04  | 0.25  | 0.81  | 0.67  |
| Total irrigation applied |                 | 9.16                  | 12.69 | 16.41 | 21.14 | 25.51 | 15.67 | 32.30 |

Note: ET: crop potential evapotranspiration, which was calculated by the Penman–Monteith equation. ET50, ET100, ET75, ET100, ET125, and ET150 scenarios were represented five deficit irrigation levels in the greenhouse experiment. ET95 scenario was the optimal DI for maximizing water productivity (WP).
